# Supplementary material for: Quality of care indicator performance was minimally changed in 2020 despite the COVID-19 pandemic
Source: Springer Nature journal article supplement (doi:10.1186/s13584-022-00516-x), 2022-01-31
Supplement: MOESM1 [file 20084710]

**Additional table 1.** Actual number of cases (denominator and numerator populations) of the quality indicators enrolled in the NPQI in 2019 and 2020.

| Indicator                                                       | Denominator population |           | Numerator population |         |
|-----------------------------------------------------------------|------------------------|-----------|----------------------|---------|
|                                                                 | 2019                   | 2020      | 2019                 | 2020    |
| <b>General Hospitals</b>                                        |                        |           |                      |         |
| PCI within 90 Minutes                                           | 3,067                  | 3,096     | 2,825                | 2,856   |
| Femoral Neck Fracture Repair within 48 Hours                    | 6,408                  | 6,137     | 5,535                | 5,501   |
| Antibiotic Prophylaxis for Colon/Rectal Surgeries               | 3,132                  | 2,979     | 2,707                | 2,819   |
| Antibiotic Prophylaxis for Caesarean Sections                   | 28,042                 | 27,129    | 26,923               | 26,239  |
| Antibiotic Prophylaxis for Femoral Neck Fracture Repairs        | 6,276                  | 6,043     | 5,693                | 5,679   |
| VTE Risk Assessment                                             | 119,104                | 94,619    | 114,354              | 91,097  |
| Duplex Carotid Ultrasound within 72 Hours                       | 5,081                  | 4,380     | 4,280                | 3,763   |
| Pain Assessment upon Discharge from PACU                        | 309,817                | 310,073   | 300,940              | 302,501 |
| Antenatal Corticosteroids                                       | 1,808                  | 1,538     | 1,786                | 1,523   |
| Recommendation for Intensive Statins Treatment for ACS Patients | 8,665                  | 8,459     | 8,209                | 8,072   |
| Body Temperature Measurement in PACU                            | 225,275                | 214,350   | 212,112              | 205,117 |
| Body Temperature Measurement of Preterm Neonates in NICU        | 1,498                  | 1,240     | 1,289                | 1,121   |
| Median Time from Arrival at ED to Triage                        | 2,354,147              | 1,928,903 |                      |         |
| Median Time to Head CT/MRI for Patients with AIS                | 3,641                  | 3,471     |                      |         |
| IV-rtPA and/or Mechanical Embolectomy for Patients with AIS     | 1,735                  | 1,893     |                      |         |
| <b>Geriatric Hospitals</b>                                      |                        |           |                      |         |
| Functional Assessment (Femoral Neck Fracture)                   | 3,226                  | 2,608     | 3,076                | 2,463   |
| Complete Nutritional Assessment                                 | 4,808                  | 4,206     | 4,232                | 3,551   |
| Nutritional Screening within 36 Hours                           | 24,380                 | 20,228    | 23,927               | 19,727  |
| Vitamin D Recommendation after Hip Fracture Repair              | 3,086                  | 2,640     | 2,991                | 2,570   |
| Depression Screening                                            | 2,539                  | 1,914     | 2,233                | 1,641   |
| Functional Assessment (Stroke)                                  | 2,267                  | 2,021     | 2,162                | 1,937   |
| Complete Nutritional Assessment (Mechanical Ventilation)        | 1,248                  | 1,087     | 1,214                | 980     |
| Diabetic Foot Lesions Assessment                                | 11,594                 | 9,709     | 11,069               | 8,882   |
| Fall Risk Assessment                                            | 24,960                 | 20,394    | 24,515               | 19,906  |
| Delirium Assessment after Femoral Neck Fracture Repair          | 3,799                  | 2,964     | 3,566                | 2,729   |
| Post-Stroke Depression Screening                                | 2,741                  | 2,314     | 2,439                | 2,055   |
| Cognitive Screening                                             | 12,152                 | 9,841     | 10,599               | 8,726   |
| Discussion with Patient/Family re Treatment Plan                | 3,186                  | 2,860     | 2,444                | 2,158   |
| <b>Psychiatric Hospitals</b>                                    |                        |           |                      |         |
| Scheduling of a Follow-Up Appointment                           | 20,020                 | 18,563    | 17,916               | 16,908  |
| Assessment for Risk of Violence                                 | 62,780                 | 58,210    | 59,623               | 55,450  |
| A meeting between Physician and Child's Family                  | 1,391                  | 1,254     | 1,202                | 887     |
| Screening Survey: BMI                                           | 2,073                  | 1,973     | 2,027                | 1,924   |
| Screening Survey: Blood Pressure                                | 2,073                  | 1,973     | 2,065                | 1,968   |
| Screening Survey: Diabetes                                      | 1,753                  | 1,661     | 1,509                | 1,449   |
| Screening Survey: Lipid Profile                                 | 2,073                  | 1,970     | 1,787                | 1,795   |
| Screening Survey: Fecal Occult Blood Test                       | 311                    | 302       | 159                  | 185     |
| Screening Survey: Mammography                                   | 62                     | 70        | 34                   | 32      |
| <b>Emergency Medical Services</b>                               |                        |           |                      |         |
| Aspirin Administration in Suspected Cardiac Event               | 21,488                 | 23,006    | 20,126               | 21,971  |
| Standard CVA Evaluation                                         | 11,674                 | 12,051    | 11,305               | 11,674  |
| Hospital Preliminary Notification of Suspected CVA              | 11,674                 | 12,051    | 10,802               | 11,337  |
| Providing Hospital with ECG Results of Suspected STEMI          | 3,821                  | 3,825     | 3,576                | 3,630   |
| <b>Mother &amp; Baby Health Centers</b>                         |                        |           |                      |         |
| Postpartum Depression Screening                                 | 171,283                | 166,067   | 141,195              | 134,813 |
| Head Circumference Measurements                                 | 177,609                | 174,385   | 162,834              | 153,858 |
| MMR/MMRV Vaccination                                            | 179,036                | 175,473   | 130,795              | 125,672 |
| Five-in-One DTap+IPV+Hib Vaccination                            | 178,877                | 177,254   | 143,055              | 143,559 |
| Cognitive Development Examination at Ages 2-3                   | 176,611                | 177,736   | 148,824              | 146,608 |
| First Visit to Mother & Baby Health Center                      | 166,023                | 162,458   | 71,834               | 70,394  |
| Violence Screening for Postpartum Women                         | 171,673                | 167,181   | 146,932              | 139,528 |
| Exclusive Breastfeeding from Birth to Four Months               | 82,511                 | 80,772    | 56,878               | 56,092  |
| Pertussis Vaccination                                           | 177,810                | 173,594   | 114,678              | 116,238 |
| Development Examination between Ages 4 to 6                     | 142,879                | 146,523   | 34,458               | 32,590  |
