# Supplementary material for: Quality of care indicator performance was minimally changed in 2020 despite the COVID-19 pandemic
Source: Springer Nature journal article supplement (doi:10.1186/s13584-022-00516-x), 2022-01-31
Supplement: MOESM2 [file 20084710]

**Additional table 2.** Selected indicators of the healthcare utilization in Israel in 2019 and 2020.

| <b>Indicator</b>                       | <b>2019</b>       | <b>2020</b>       |
|----------------------------------------|-------------------|-------------------|
| Bed occupancy rate                     |                   |                   |
| General care                           | 90.7%             | 80.8%             |
| Long-term care                         | 88.0%             | 85.3%             |
| Rehabilitation                         | 101.4%            | 95.4%             |
| Psychiatric care                       | 94.7%             | 87.2%             |
| Emergency department visits            | $3.1 \times 10^6$ | $2.6 \times 10^6$ |
| Rate of ED visits per 1,000 population | 341               | 283               |
| Live births                            | 182,016           | 177,307           |

Data source: the Health Information Division of the Ministry of Health (7, 8) and the Central Bureau of Statistics (11).
